# Supplementary material
Source: publisher figshare collection journal article supplement (https://acs.figshare.com/ndownloader/files/17349266)
Supplement: Supplementary file 1 [file 17349266]

Supporting Information for

**Influence of High Total Dissolved Solids Concentration and Ionic Composition on Gamma Spectroscopy Radium Measurements of Oil and Gas Produced Water**

Moses A. Ajemigbitse,<sup>\*,‡</sup> Travis L. Tasker,<sup>†</sup> Fred S. Cannon,<sup>‡</sup> and Nathaniel R. Warner<sup>‡</sup>

<sup>‡</sup> Department of Civil and Environmental Engineering, Pennsylvania State University, 212 Sackett Building, University Park, Pennsylvania 16802, United States

<sup>†</sup> Department of Environmental Engineering, Saint Francis University, Science Center, Loretto, Pennsylvania 15940, United States

**\*Corresponding author:**

Moses A. Ajemigbitse

Department of Civil and Environmental Engineering, the Pennsylvania State University

University Park, Pennsylvania, 16802

Email: mosesajemigbitse@gmail.com

Telephone: (814) 321-4632

# of Pages: 9

# of Figures: 1

# of Tables: 8

**Table S1:** Gamma decay probability for Ra-226 and Ra-228 daughter decay products employed for efficiency determination. <sup>1</sup>

| Nuclide            | Ra-226 | Pb-214 | Pb-214 | Bi-214 | Ac-228 | Bi-214 | Bi-214 |
|--------------------|--------|--------|--------|--------|--------|--------|--------|
| Energy Level (keV) | 186.2  | 295.2  | 351.9  | 609.3  | 911.2  | 1120   | 1765   |
| Probability        | 0.0364 | 0.1842 | 0.356  | 0.4549 | 0.258  | 0.1492 | 0.1530 |

**Table S2:** Elemental composition of the mixed-cation synthetic brines. The amount of each salt added to 1 L of Distilled-Deionized Water to create the brine at each given TDS concentration.

| Salt mass added (g) to create 1 L of mixed-cation synthetic brines |        |         |         |         |
|--------------------------------------------------------------------|--------|---------|---------|---------|
|                                                                    | 50 g/L | 100 g/L | 200 g/L | 300 g/L |
| NaCl                                                               | 28.68  | 57.36   | 114.71  | 172.07  |
| CaCl <sub>2</sub>                                                  | 10.89  | 21.78   | 43.57   | 65.35   |
| BaCl <sub>2</sub>                                                  | 5.45   | 10.90   | 21.80   | 32.70   |
| MgCl <sub>2</sub>                                                  | 1.87   | 3.74    | 7.48    | 11.21   |
| SrCl <sub>2</sub>                                                  | 3.11   | 6.22    | 12.45   | 18.67   |

**Table S3:** Elemental composition of Appalachian oil and gas produced water. <sup>2</sup>

| Source                     |        | TDS (mg/L) | Cl (mg/L) | Na (mg/L) | Ca (mg/L) | Sr (mg/L) | Ba (mg/L) | <sup>226</sup> Ra (pCi/L) | <sup>228</sup> Ra (pCi/L) | 228 / 226 |
|----------------------------|--------|------------|-----------|-----------|-----------|-----------|-----------|---------------------------|---------------------------|-----------|
| Produced Appalachian Basin | Mean   | 189,410    | 112,081   | 42,987    | 20,076    | 782       | 507       | 881                       | 1,127                     | 1.28      |
|                            | Median | 186,600    | 112,572   | 42,550    | 17,600    | 727       | 230       | 480                       | 500                       | 1.04      |
|                            | Count  | 1,965      | 1,867     | 1,800     | 1,841     | 1,072     | 592       | 95                        | 72                        |           |
| Produced Marcellus         | Mean   | 91,888     | 51,714    | 26,527    | 7,023     | 1,449     | 1,076     | 3,976                     | 425                       | 0.11      |
|                            | Median | 59,750     | 34,000    | 18,000    | 4,360     | 953       | 297       | 1,042                     | 201                       | 0.19      |
|                            | Count  | 110        | 103       | 100       | 129       | 165       | 110       | 31                        | 31                        |           |

**Table S4:** Results of the linear regression of efficiency versus TDS for the NaCl-only synthetic brine and the multi-cation synthetic brine. The TDS-influenced attenuation factor,  $\alpha_{TDS}$ , its 95 % CI and p-values at each energy level are presented.

| Energy Level (keV) |                               | 186   | 295   | 351   | 609    | 911    | 1120  | 1764  |
|--------------------|-------------------------------|-------|-------|-------|--------|--------|-------|-------|
| Multi-cation       | $\alpha_{TDS} \times 10^{-4}$ | −2.57 | −1.66 | −1.46 | −0.523 | 0.0255 | −0.3  | −0.36 |
|                    | 95% CI $\times 10^{-6}$       | 2     | 12    | 14    | 8      | 6      | 16    | 30    |
|                    | p-value                       | 0.025 | 0.013 | 0.005 | 0.011  | 0.821  | 0.035 | 0.098 |
| NaCl-only          | $\alpha_{TDS} \times 10^{-4}$ | −1.56 | −1.27 | −1.07 | −0.375 | −0.177 | −0.24 | −0.28 |
|                    | 95% CI $\times 10^{-6}$       | 0     | 4     | 10    | 2      | 4      | 16    | 32    |
|                    | p-value                       | 0.001 | 0.002 | 0.004 | 0.001  | 0.132  | 0.059 | 0.182 |

**Table S5:** Validation of the linear regressions of efficiency against TDS. The empirically calculated efficiency was divided by the efficiency predicted by the regression equation for each energy level and at each TDS level. These are the column values. Then the averages and 95% CI of these values were calculated, shaded in grey. Finally, the averages and 95% CI of all data points at all the energy levels was calculated, bolded and italicized.

| Multi-Cation Synthetic brine |                     |         |         |         |         |       |
|------------------------------|---------------------|---------|---------|---------|---------|-------|
| TDS (g/L)                    | 186 keV             | 295 keV | 351 keV | 609 keV | 911 keV |       |
| 0                            | 99%                 | 105%    | 103%    | 105%    | 103%    |       |
| 50                           | 98%                 | 99%     | 101%    | 100%    | 97%     |       |
| 100                          | 101%                | 93%     | 94%     | 92%     | 99%     |       |
| 200                          | 101%                | 98%     | 97%     | 100%    | 101%    |       |
| 300                          | 99%                 | 105%    | 104%    | 104%    | 100%    |       |
| <b>Ave</b>                   | <b><i>100%</i></b>  | 99.7%   | 100%    | 100%    | 100%    | 100%  |
| <b>95 CI</b>                 | <b><i>7.01%</i></b> | 2.4%    | 10.8%   | 8.35%   | 10.1%   | 5.17% |

  

| NaCl-only Synthetic brine |                     |         |         |         |         |       |
|---------------------------|---------------------|---------|---------|---------|---------|-------|
| TDS (g/L)                 | 186 keV             | 295 keV | 351 keV | 609 keV | 911 keV |       |
| 0                         | 101%                | 101%    | 103%    | 102%    | 103%    |       |
| 50                        | 101%                | 100%    | 98%     | 99%     | 98%     |       |
| 100                       | 99%                 | 99%     | 98%     | 99%     | 100%    |       |
| 200                       | 101%                | 97%     | 98%     | 99%     | 99%     |       |
| 300                       | 100%                | 103%    | 103%    | 102%    | 102%    |       |
| <b>Ave</b>                | <b><i>100%</i></b>  | 100%    | 100%    | 100%    | 100%    | 100%  |
| <b>95 CI</b>              | <b><i>2.85%</i></b> | 1.62%   | 4.68%   | 5.22%   | 3.15%   | 4.18% |

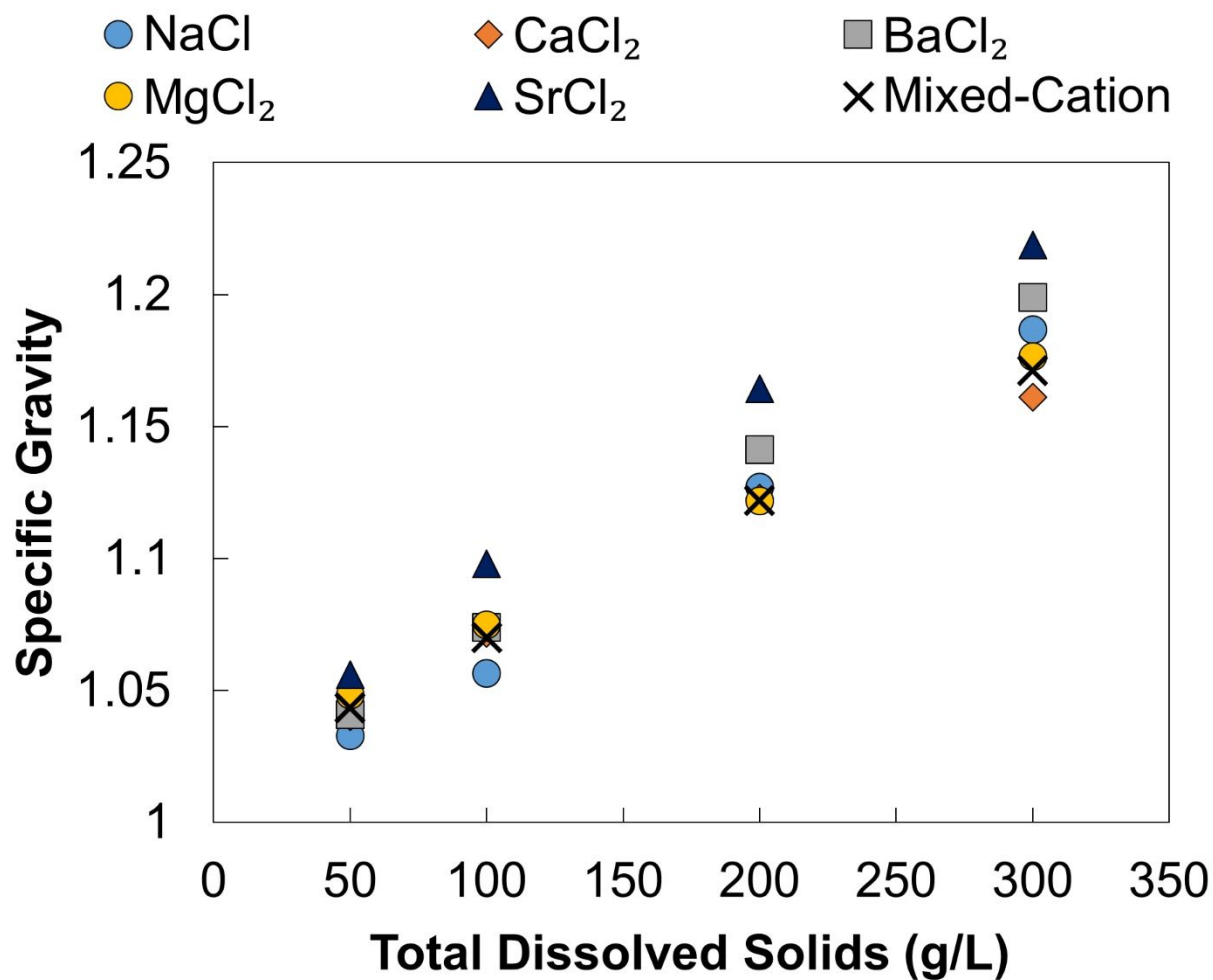

**Figure S1:** The TDS and specific gravities of NaCl, CaCl<sub>2</sub>, BaCl<sub>2</sub>, MgCl<sub>2</sub>, SrCl<sub>2</sub>, and mixed Na-Ca-Ba-Mg-Sr-Cl brine solutions.

**Calculating the attenuation factor by the theoretical approach of Appleby *et al.* 1992 <sup>3</sup> and Hubbell 1981 <sup>4</sup>**

Appleby *et al.* in their paper put forth a theoretical model to calculate the self-adsorption factor for a well-detector  $\gamma$ -spec. In their paper, they introduce a geometric parameter,  $k$  shown in Eq. (S1) and (S2), which characterizes the dimensions of the well detector/sample holder. This parameter was defined theoretically and then determined empirically. For a gamma ray beam of incident intensity  $I_0$ , they derive the attenuation factor  $I/I_0$ , as being dependent on sample mass and the mass attenuation coefficient,  $\mu$ . The mass attenuation coefficients can be obtained from Hubbell's work, provided the exact elemental composition of the sample is known.

Herein, we attempt to derive the attenuation coefficient for the 300 g/L mixed-cation synthetic brine based on the theoretical work of Appleby and Hubbell.

$$k_t = \frac{1}{\lambda \pi a L} \quad (S1)$$

$$k_e = \frac{0.133}{a^2} (\lambda L/a)^{-0.687} \quad (S2)$$

$$0 < \lambda \leq 1 \quad (S3)$$

$$\frac{I}{I_0} = f(m) \begin{cases} e^{-k\mu m} & \text{for } k\mu m < 0.28 \\ \left(1 + \frac{(k\mu m)^2}{4}\right) e^{-k\mu m} & \text{for } 0.28 < k\mu m < 1.15 \end{cases} \quad (S4)$$

Where,

$k_t$  is the theoretical derivation for the geometric parameter

$k_e$  is the empirical derivation for the geometric parameter

$\lambda$  describes the depth to which the sample holder has been filled

$a$  is the radius of the sample holder

$L$  is the depth of the sample holder

$\mu$  is the mass attenuation coefficient

$m$  is the sample mass

76

77 **Table S6:** The dimensional characteristics of our well detector and the geometric parameter based  
 78 on theoretical or empirical relationships of Eq. (1) – Eq. (3).

| Parameter | Value    |        |        |
|-----------|----------|--------|--------|
| $a$       | 1.675 cm | 0.0469 | 0.0258 |
| $L$       | 4.05 cm  |        |        |
| $\lambda$ | 1        |        |        |

79

80 **Table S7:** The sample mass attenuation factor,  $\mu_m$ , for the 300 g/L mixed-cation synthetic brine  
 81 at 150 keV and at 200 keV.

| Element           |              | (cm <sup>2</sup> /g) |              | (cm <sup>2</sup> ) |             |
|-------------------|--------------|----------------------|--------------|--------------------|-------------|
|                   | <i>grams</i> | 150 keV              | 200 keV      | 150 keV            | 200 keV     |
| Na                | 1.45         | 0.1335               | 0.1199       | 0.193              | 0.174       |
| Ba                | 0.0356       | 0.7827               | 0.4045       | 0.0279             | 0.0144      |
| Mg                | 0.103        | 0.1393               | 0.1245       | 0.0143             | 0.0128      |
| Ca                | 0.877        | 0.1671               | 0.1374       | 0.147              | 0.1205      |
| Sr (Br*)          | 0.113        | 0.2889*              | 0.1834*      | 0.0325             | 0.0207      |
| K                 | 0.0129       | 0.1579               | 0.1318       | 0.00204            | 0.00170     |
| Cl                | 4.42         | 0.1479               | 0.1265       | 0.655              | 0.560       |
| H <sub>2</sub> O  | 20.4         | 0.1504               | 0.1370       | 3.07               | 2.79        |
| Plastic Container | 8.5          | 0.1534               | 0.1401       | 1.304              | 1.191       |
|                   |              |                      | <b>Total</b> | <b>4.14</b>        | <b>3.70</b> |

82 \*Sr data was not provided. Bromine data was used instead as it was the closest atomic number.

83

**Table S8:** The self-adsorption factor at 150 keV and 200 keV for the 300 g/L mixed-cation synthetic brine calculated for the theoretical and empirical derivations of the geometric parameter. The empirical derivations predicted 9 – 10% attenuation while the theoretical derivation predicted 20 – 22 % attenuation in the 150 – 200 keV range. Our TDS-influenced attenuation factor predicted ~23 % at 186 keV, placing it within range of the empirical values.

|       | 150 keV      | 200 keV       | 150 keV      | 200 keV      | 150 keV    | 200 keV    |
|-------|--------------|---------------|--------------|--------------|------------|------------|
| $k_t$ | <i>0.254</i> | <i>0.228</i>  | <i>0.776</i> | <i>0.796</i> | <b>22%</b> | <b>20%</b> |
| $k_e$ | <i>0.140</i> | <i>0.1256</i> | <i>0.870</i> | <i>0.882</i> | <b>13%</b> | <b>12%</b> |



## Error Propagation for reporting error of measured <sup>226</sup>Ra activities

Radium-226 activities of all solid samples were determined by gamma spectroscopy on a Canberra ultra-low background small anode, high purity germanium (HPGe) well detector, after the incubation period of three weeks. The reported <sup>226</sup>Ra activity was the average of the daughter products activities (<sup>214</sup>Bi at 295.2 keV and 351.9 keV, <sup>214</sup>Po at 609.3 keV). The standard errors (in %) reported by the software (Genie 2000) at each energy level were used to calculate the counting error. This counting error was calculated as follows:

$$\epsilon_{counting}[\%] = \sqrt{\left(\frac{1}{3}\right)^2 (\epsilon_{295}^2 + \epsilon_{351}^2 + \epsilon_{609}^2)} \quad (5)$$

Where:

$\epsilon_{295}$  was the standard error in % at 295.2 keV

$\epsilon_{351}$  was the standard error in % at 351.9 keV

$\epsilon_{609}$  was the standard error in % at 609.3 keV

The total error included the error from counting, mass measurement and uncertainty of the detector efficiency:

$$\epsilon_{total}\left[\frac{Bq}{g}\right] = \frac{Activity [cps]}{mass [g] \times eff[\frac{cps}{Bq}]} \sqrt{\epsilon_{counting}^2 + \left(\frac{\epsilon_{eff}}{eff}\right)^2 + \left(\frac{\epsilon_{mass}}{mass}\right)^2} \quad (6)$$

We found that the error from mass measurement and the uncertainty of the detector efficiency were small compared to the counting error, thus this simplified the total error to:

$$\epsilon_{total}\left[\frac{Bq}{g}\right] = \frac{Activity [cps]}{mass [g] \times eff[\frac{cps}{Bq}]} \times \epsilon_{counting}[\%] \quad (7)$$

**SI References**

- (1) Gilmore, G. R. *Practical Gamma-Ray Spectrometry*; John Wiley & Sons, Ltd: Chichester, UK, 2008. <https://doi.org/10.1002/9780470861981>.
- (2) Geeza, T. J.; Gillikin, D. P.; McDevitt, B.; Van Sice, K.; Warner, N. R. Accumulation of Marcellus Formation Oil and Gas Wastewater Metals in Freshwater Mussel Shells. *Environ. Sci. Technol.* 2018, 52 (18), 10883–10892.
- (3) Appleby, P. G.; Richardson, N.; Nolan, P. J. Self-Absorption Corrections for Well-Type Germanium Detectors. *Nucl. Instruments Methods Phys. Res. Sect. B Beam Interact. with Mater. Atoms* 1992, 71 (2), 228–233. [https://doi.org/10.1016/0168-583X\(92\)95328-O](https://doi.org/10.1016/0168-583X(92)95328-O).
- (4) Hubbell, J. H. Photon Mass Attenuation and Energy-Absorption Coefficients. *Int. J. Appl. Radiat. Isot.* 1982, 33 (11), 1269–1290. [https://doi.org/10.1016/0020-708X\(82\)90248-4](https://doi.org/10.1016/0020-708X(82)90248-4).
